# Supplementary material for: Therapeutic siRNA for drug-resistant HER2-positive breast cancer
Source: PubMed Central journal article supplement (PMC4924747; doi:10.18632/oncotarget.7409), 2016-02-15
Supplement: oncotarget-07-14727-s001.pdf [file oncotarget-07-14727-s001.pdf]

## SUPPLEMENTARY FIGURES AND TABLES

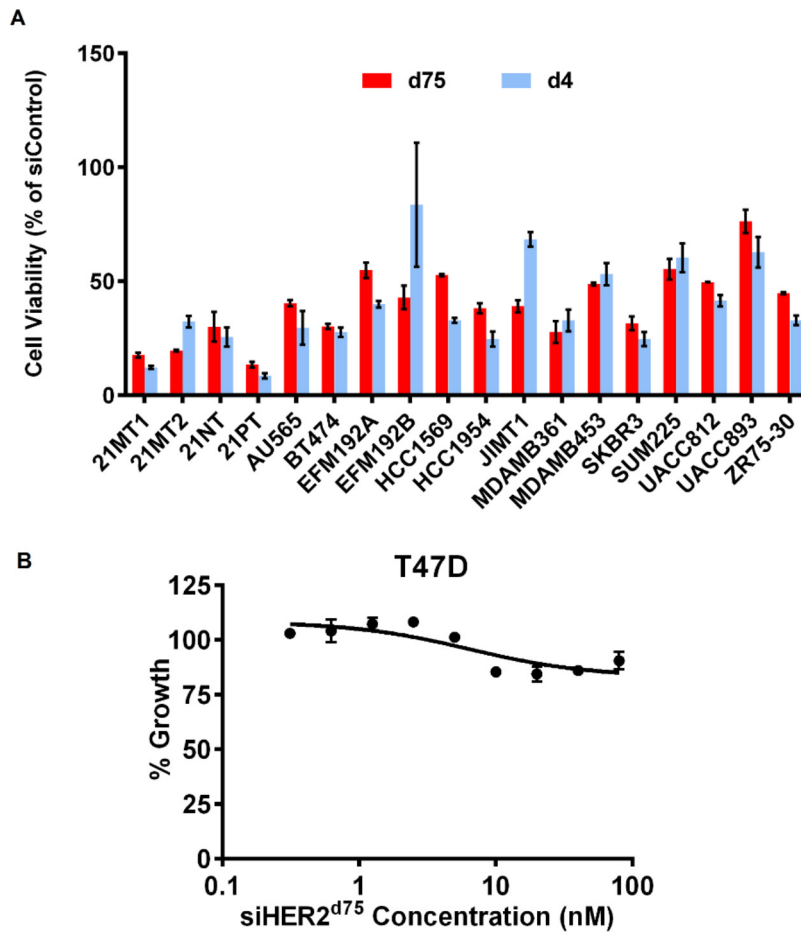

**Supplementary Figure S1:** **A.** The cell viability reduction induced by the top 2 HER2 siRNA candidates from Figure 1(A–C), measured in HER2-positive cell lines using CellTiter-Glo assay at 5 days post-transfection. All with 10 nM of siRNA delivered with DharmaFECT-1. **B.** Low off-target effect of siHER2<sup>d75</sup> was confirmed in T47D (HER2-negative) cell line, in which the GI50 was not achieved even when the siHER2<sup>d75</sup> concentration was increased to 80 nM.

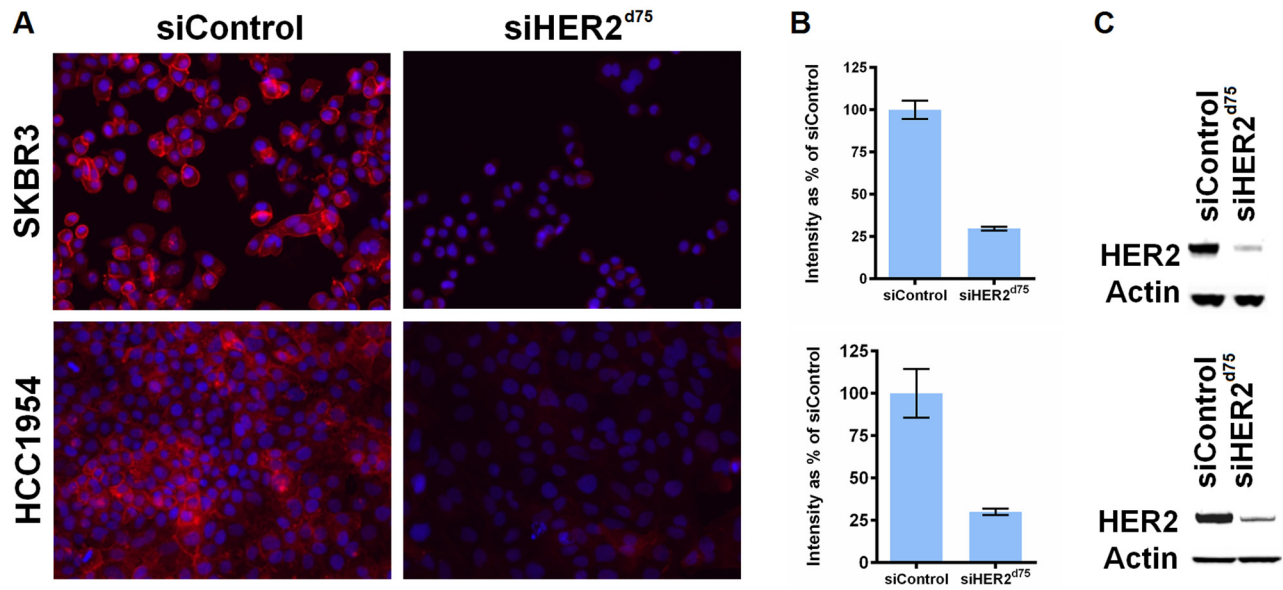

**Supplementary Figure S2:** Effect of siHER2<sup>d75</sup> on **A.** HER2 protein reduction by immunofluorescent imaging (200x magnification), **B.** corresponding quantified mean signal intensity of HER2, and **C.** HER2 protein reduction analyzed by western blot in SKBR3 and HCC1954 cells. Cells were transfected with 10 nM siHER2<sup>d75</sup> or siControl for 72 h prior to analysis.

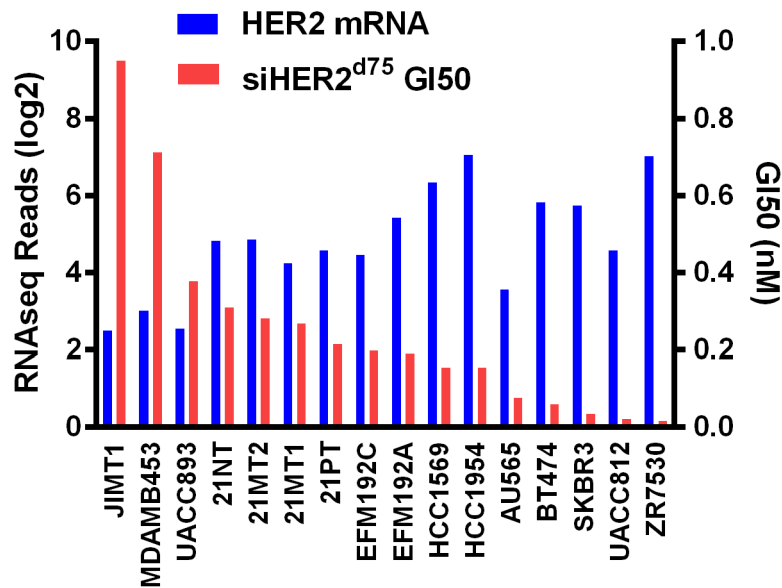

**Supplementary Figure S3:** Respective GI50 values of siHER2<sup>d75</sup> versus HER2 mRNA expression level determined by RNAseq in the 16 HER2-positive cell lines used in the study. Experimental conditions for GI50 measurement are the same as in Figure 3.

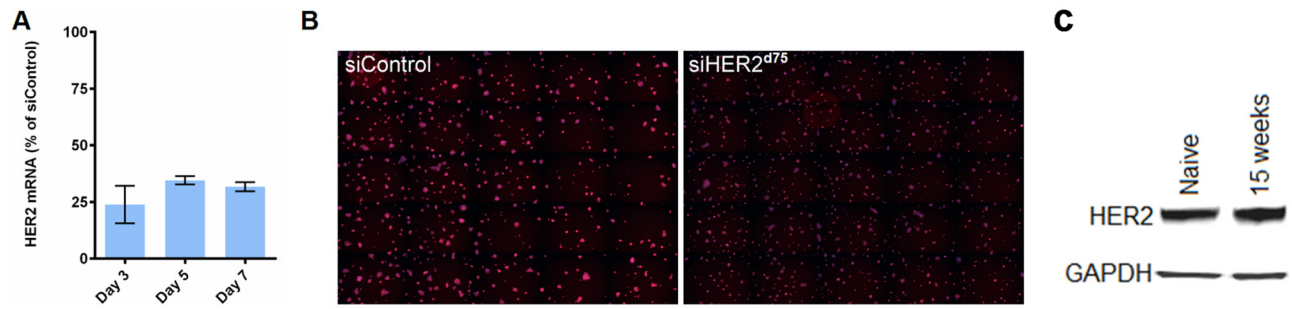

**Supplementary Figure S4:** **A.** HER2 mRNA levels in BT474 at days 3, 5 and 7 post-transfection of 1 nM siHER2<sup>d75</sup>. Indicated values represent the fraction of HER2 remaining relative to siControl. **B.** HER2 levels by immunofluorescent detection in BT474 cells treated with 1 nM of siControl or siHER2<sup>d75</sup> for 72 h. Image is a composite of 25 fields at 100x (each). Red = HER2, Blue = DAPI stained for nuclei. **C.** HER2 protein levels in the naïve BT474 cells (i.e., never been treated with siHER2<sup>d75</sup>) and those treated continuously with 1 nM siHER2<sup>d75</sup> for 15 weeks (siHER2<sup>d75</sup> treatment was withdrawn for 1 week prior to western blot analysis).

Supplementary Table S1: Sequences and molecular weights of HER2 siRNAs

| siRNA | Target Sequence           | Molecular Weight | siRNA | Target Sequence           | Molecular Weight |
|-------|---------------------------|------------------|-------|---------------------------|------------------|
| d1    | GCCAGGUGGUGCAGGGAAA       | 13355            | d39   | GCAGAUGCGGAUCCUGAAA       | 13325            |
| d2    | GCUCAUCGCUCACAACCAA       | 13325            | d40   | AGAUGCGGAUCCUGAAAGA       | 13310            |
| d3    | GCACCCAGCUCUUUGAGGA       | 13340            | d41   | AUGCGGAUCCUGAAAGAGA       | 13310            |
| d4    | AUGGAGACCCGCUGAACAA       | 13325            | d42   | AAGAGACGGAGCUGAGGAA       | 13325            |
| d5    | GGAGACCCGCUGAACAAUA       | 13325            | d43   | GGUGAAGGUGCUUGGAUCU       | 13325            |
| d6    | CUUCGAAGCCUCACAGAGA       | 13325            | d44   | CGGCAGCAGAAGAUCGGAAGUACA  | 17198            |
| d7    | CCUCACAGAGAUCUUGAAA       | 13215            | d45   | CCCAAAGCCAACAAAGAAA       | 13295            |
| d8    | UCACAGAGAUCUUGAAAGG       | 13333            | d46   | CCAAAGCCAACAAAGAAAU       | 13280            |
| d9    | GGGUCUUGAUCCAGCGGAA       | 13421            | d47   | GCAGAUGCGGAUCCUGAAA       | 13325            |
| d10   | CCCAGCUCUUUGAGGACAA       | 13293            | d48   | CGGAGCUGAGGAAGGUGAAGGUGCU | 17213            |
| d11   | GCUCUUUGAGGACAACUAU       | 13294            | d49   | CGGUGCAGCUGGUGACACA       | 13355            |
| d12   | UCACACUGAUAGACACCAA       | 13295            | d50   | UGACACAGCUUAUGCCCUA       | 13310            |
| d13   | GGGAGAGAGUUCUGAGGAU       | 13325            | d51   | CUGAACUGGUGUAUGCAGA       | 13310            |
| d14   | GGAGAGAGUUCUGAGGAUU       | 13310            | d52   | GCAGCUGGUGACACAGCUU       | 13340            |
| d15   | GGAAGGACAUCUCCACAA        | 13310            | d53   | AGACAGAGUACCAUGCAGA       | 13616            |
| d16   | GCUGGCUCUCACACUGAUA       | 13325            | d54   | GGUCAAGAGUCCCAACCAU       | 13325            |
| d17   | CGUUUGAGUCCAUGCCCAA       | 13325            | d55   | GAUGAUUGACUCUGAAUGU       | 13280            |
| d18   | GCAUGGAGCACUUGCGAGA       | 13340            | d56   | CGGCCAAGAUUCCGGGAGU       | 13355            |
| d19   | GUGCCAAUAUCCAGGAGUU       | 13310            | d57   | GGGAGUUGGUGUCUGAAUU       | 13310            |
| d20   | CAACCAAGAGGUGACAGCAGAGGAU | 17183            | d58   | GCUUUGUGGUCAUCCAGAA       | 13303            |
| d21   | GCUCCAAGUGUUUGAGACU       | 13311            | d59   | GCUCACUGCUGGAGGACGA       | 13355            |
| d22   | UGUUUGAGACUCUGGAAGA       | 13295            | d60   | UGGUGGAUGCUGAGGAGUA       | 13325            |
| d23   | UGGAAGAGAUCACAGGUUA       | 13295            | d61   | GGUGGAUGCUGAGGAGUAU       | 13325            |
| d24   | GGAAGAGAUCACAGGUUAC       | 13310            | d62   | CAAAGUUGGAUGAUUGACUCUGAA  | 17122            |
| d25   | GCAGUUACCAGUGCCAAUA       | 13304            | d63   | CAGCGCUUUGUGGUCAUCCAGAAUG | 17179            |
| d26   | UCCAGAACCUGCAAGUAA        | 13294            | d64   | GCCAGUCCCUUGGACAGCACCUUCU | 17212            |
| d27   | CCUGGCAUUUCUGCCGGAGAGCUUU | 17198            | d65   | CCGAUGUAUUUGAUGGUGA       | 13295            |
| d28   | GGGACCAGCUCUUUCGGAA       | 13340            | d66   | CCUCUGAGACUGAUGGCUA       | 13325            |
| d29   | GGCCAGAGGACGAGUGUGU       | 13355            | d67   | GACACUAGGGCUGGAGCCCUCUGAA | 17213            |
| d30   | AGGACGAGUGUGUGGGCGA       | 13355            | d68   | GCUGGUGCCACUCUGGAAA       | 13340            |
| d31   | AGGAGUGCGUGGAGGAAUG       | 13340            | d69   | CGGCAGAGAACCCAGAGUA       | 13340            |
| d32   | GGGACCAGCUCUUUCGGAA       | 13340            | d70   | UGGAAGAGAUCACAGGUUA       | 13295            |
| d33   | GAGUAUGUGAAUGCCAGGCACUGUU | 17168            | d71   | GAGACCCGCUGAACAAUAC       | 13326            |
| d34   | GUGUGGACCUGGAUGACAA       | 13325            | d72   | GGAGGAAUGCCGAGUACUG       | 13340            |
| d35   | CAGUGUGUGGCCUGUGCCCACUAUA | 17198            | d73   | GCUCAUCGCUCACAACCAA       | 13324            |
| d36   | CAGCAGAAGAUCGGAAGU        | 13325            | d74   | AACAAAGAAAUCUUAGACGAA     | 14536            |
| d37   | CAGAAGAUCGGAAGUACA        | 13310            | d75   | CACGUUUGAGUCCAUGCCCAA     | 14611            |
| d38   | CGGAAGUACACGAUGCGGA       | 13340            | d76   | GGUGCUUGGAUCUGGCGCUUU     | 14626            |

**Supplementary Table S2: Sequences of control siRNAs**

| <b>SiRNA</b>  | <b>Target Sequence</b> | <b>Manufacturer</b>          |
|---------------|------------------------|------------------------------|
| Luciferase    | CAAGCUGACCCUGAAGUUCUU  | QIAGEN                       |
| GFP           | CGUACGCGGAAUACUUCGAUU  | QIAGEN                       |
| AllStar       | GGGUAUCGACGAUUACAAA    | QIAGEN                       |
| ON-TARGETplus | Proprietary            | Thermo Scientific Dharmacon® |
| siSCR         | UGGUUUACAUGUCGACUAA    | Thermo Scientific Dharmacon® |
